# Supplementary material for: Size-controllable fabrication of PbS quantum dots for NIR–SWIR photodetectors with extended wavelengths
Source: Royal Society of Chemistry journal article supplement (doi:10.1039/d4tc03229b), 2024-01-01
Supplement: d4tc03229b1.pdf [file d4tc03229b1.pdf]

## Supporting Information

### Size-controllable fabrication of PbS quantum dots for NIR-SWIR photodetector with extended wavelength

Qilong Wang<sup>a</sup>, Congya You<sup>b</sup>, Qi Yan<sup>c</sup>, Qingjuan Xie<sup>a</sup>, Wenjie Deng<sup>c</sup>, Ming Liu<sup>b</sup>, Huiyu Li<sup>a,\*</sup>,

Songlin Yu<sup>b,\*</sup>, Yongjun Feng<sup>a,\*</sup>

<sup>a</sup> State Key Laboratory of Chemical Resource Engineering, Beijing Engineering Center for Hierarchical Catalysts, Beijing University of Chemical Technology, No. 15 Beisanhuan East Road, Chaoyang District, Beijing 100029, China

<sup>b</sup> North China Research Institute of Electro-Optics, Beijing 100015, China

<sup>c</sup> Key Laboratory of Optoelectronics Technology, School of information science and technology, Beijing University of Technology, Beijing 100124, China

\*Corresponding author (H. Li; Y. Feng)

#### 1. Effects of reaction time and temperature

**Table S1** Wavelength of exciton absorption peak and particle size corresponding to growth time.

| Samples | Temperature (°C) | Growth time (s) | $\lambda_{1s}$ (nm) |
|---------|------------------|-----------------|---------------------|
| PbS-1   |                  | 30              | -                   |
| PbS-2   | 190              | 60              | -                   |
| PbS-3   |                  | 90              | -                   |
| PbS-4   |                  | 30              | -                   |
| PbS-5   | 195              | 60              | -                   |
| PbS-6   |                  | 90              | -                   |
| PbS-7   |                  | 30              | -                   |
| PbS-8   | 200              | 60              | -                   |
| PbS-9   |                  | 90              | -                   |

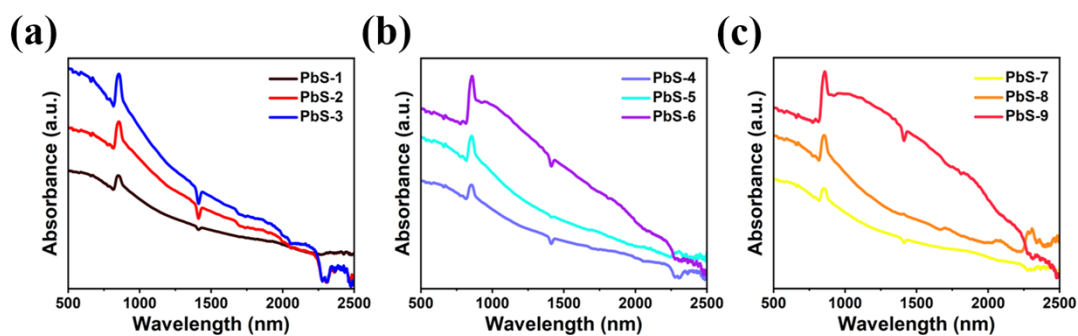

**Fig. S1** (a) Absorption spectra of PbS QDs obtained in different growth time at 190°C, (b) 195°C, (c) 200°C.

## 2. Crystallinity

**Table S2** The effect of temperature on crystallinity of PbS QDs.

| Samples | Temperature (°C) | Crystallinity (%) |
|---------|------------------|-------------------|
| 1       | 170              | 80.15             |
| 2       | 175              | 80.09             |
| 3       | 180              | 75.19             |
| 4       | 185              | 71.27             |
| 5       | 190              | 66.32             |
| 6       | 195              | 60.01             |
| 7       | 200              | 41.54             |

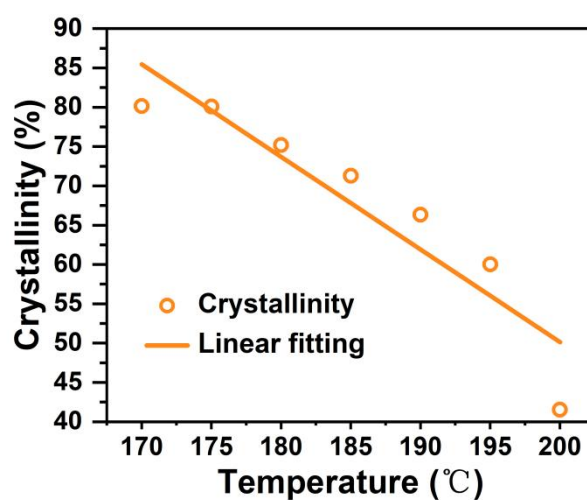

**Fig. S2** The influence of temperature on crystallinity of PbS QDs.

### 3. Effects of OA:Pb ratio

**Table S3** Wavelength of exciton absorption peaks and particle sizes of the PbS QDs synthesised at different conditions (samples are named by temperature and OA:Pb ratio).

| Samples | OA:Pb | $\lambda_{1s}$ (nm) | Average particle size (nm) |
|---------|-------|---------------------|----------------------------|
| 150-10  | 10    | ~1280               | 4.97                       |
| 150-12  | 12    | ~1374               | 5.32                       |
| 150-14  | 14    | ~1436               | 5.60                       |
| 150-16  | 16    | ~1536               | 5.94                       |
| 150-17  | 17    | ~1542               | 5.97                       |
| 150-18  | 18    | ~1528               | 5.92                       |
| 150-20  | 20    | ~1532               | 5.93                       |
| 155-17  | 17    | ~1624               | 6.20                       |
| 160-17  | 17    | ~1662               | 6.57                       |
| 165-17  | 17    | ~1692               | 7.22                       |
| 170-17  | 17    | ~1732               | 7.50                       |

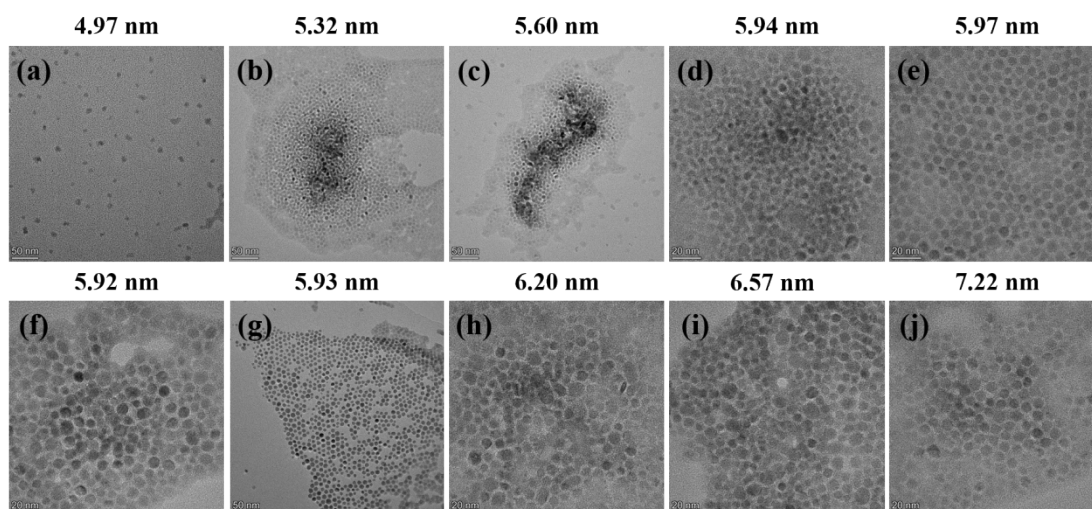

**Fig. S3** TEM images of PbS QDs synthesized at different conditons: (a) 150°C, OA:Pb = 10, (b) 150 °C, OA:Pb = 12, (c) 150 °C, OA:Pb = 14, (d) 150 °C, OA:Pb = 16, (e) 150 °C, OA:Pb = 17, (f) 150 °C, OA:Pb = 18, (g) 150 °C, OA:Pb = 20, (h) 155 °C, OA:Pb = 17, (i) 160 °C, OA:Pb = 17, (j) 165 °C, OA:Pb = 17.

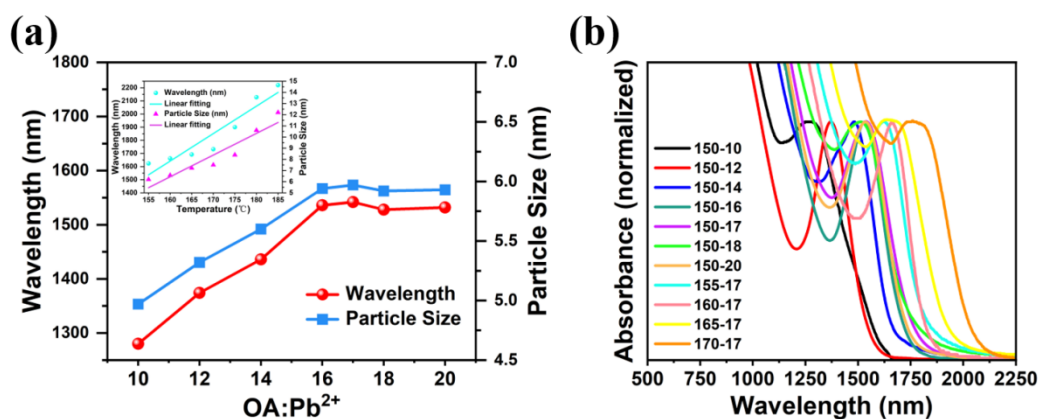

Fig. S4 (a) Influence of OA:Pb ratio on exciton absorption peak and particle size (The inset shows the influence of temperature on exciton absorption peak and particle size), (b) absorption spectra of PbS QDs synthesized at different OA:Pb ratios and temperatures.

#### 4. Ligand structure

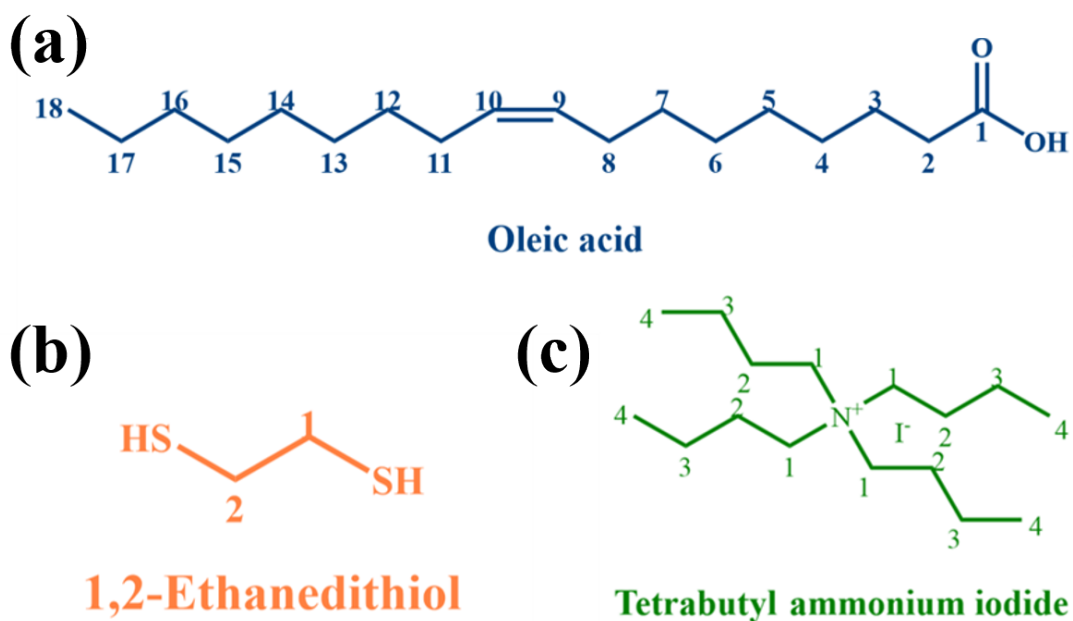

Fig. S5 (a) Structure of oleic acid, (b) 1,2-Ethanedithiol (EDT) and (c) tetrabutyl ammonium iodide (TBAI).

## 5. PL emission spectrum

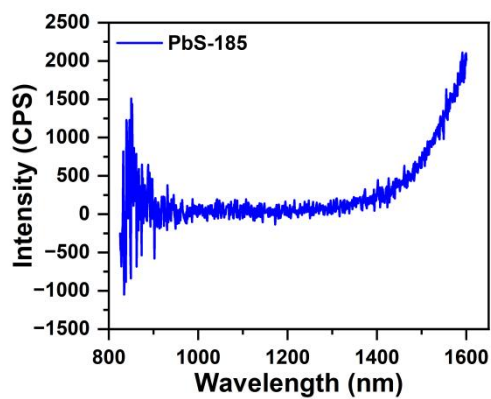

**Fig. S6** PL emission spectra of PbS QDs synthesized at 185°C, OA:Pb ratio = 17.

## 6. Long-term operational stability

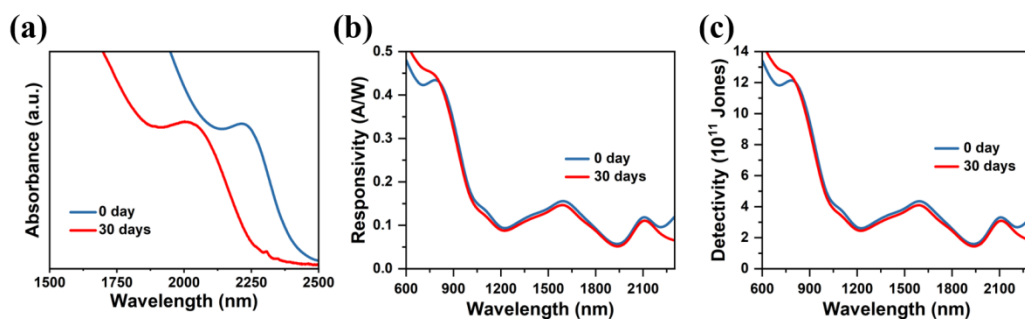

**Fig. S7** Absorption spectral changes of PbS QDs after being exposed to air for one month (a), Changes in responsivity (b) and detectivity (c) of the photodetector based on PbS QDs after one month of operation.
